**Corrigendum: *Water Supply* 22 (2), 1557–1574: Experimental and numerical investigation of flow over a spillway bend with different combinations of permeable spur dikes, Jinmeng Yang, Zhenzhong Shen, Jing Zhang, Xiaomin Teng, Wenbing Zhang and Jie Dai, doi: 10.2166/ws.2021.335**

The authors regret that the Acknowledgements section was incomplete in their original paper and apologise for any inconvenience caused. The full Acknowledgements are given below.

## ACKNOWLEDGEMENTS

This work is supported by the National Natural Science Foundation of China/Yalong River Joint Fund Project (NO. U1765205), Jiangsu Colleges and Universities Advantageous Discipline Construction Project (Water Conservancy Project) (NO. YS11001) and the Natural Science Foundation Project for Youth Scientists of Shandong Province (Grant No. ZR2020QE286).
